# Supplementary material for: Magnetically induced current density in triple-layered beryllium–boron clusters
Source: Royal Society of Chemistry journal article supplement (doi:10.1039/c9cp00541b), 2019-01-01
Supplement: c9cp00541b1.pdf [file c9cp00541b1.pdf]

## SUPPLEMENTARY INFORMATION

### **Magnetically induced current density in triple-layered beryllium-boron clusters**

Sladana Đorđević and Slavko Radenković\*

*Faculty of Science, University of Kragujevac, P. O. Box 60, 34000 Kragujevac, Serbia*

\*Corresponding authors: [slavkoradenkovic@kg.ac.rs](mailto:slavkoradenkovic@kg.ac.rs)

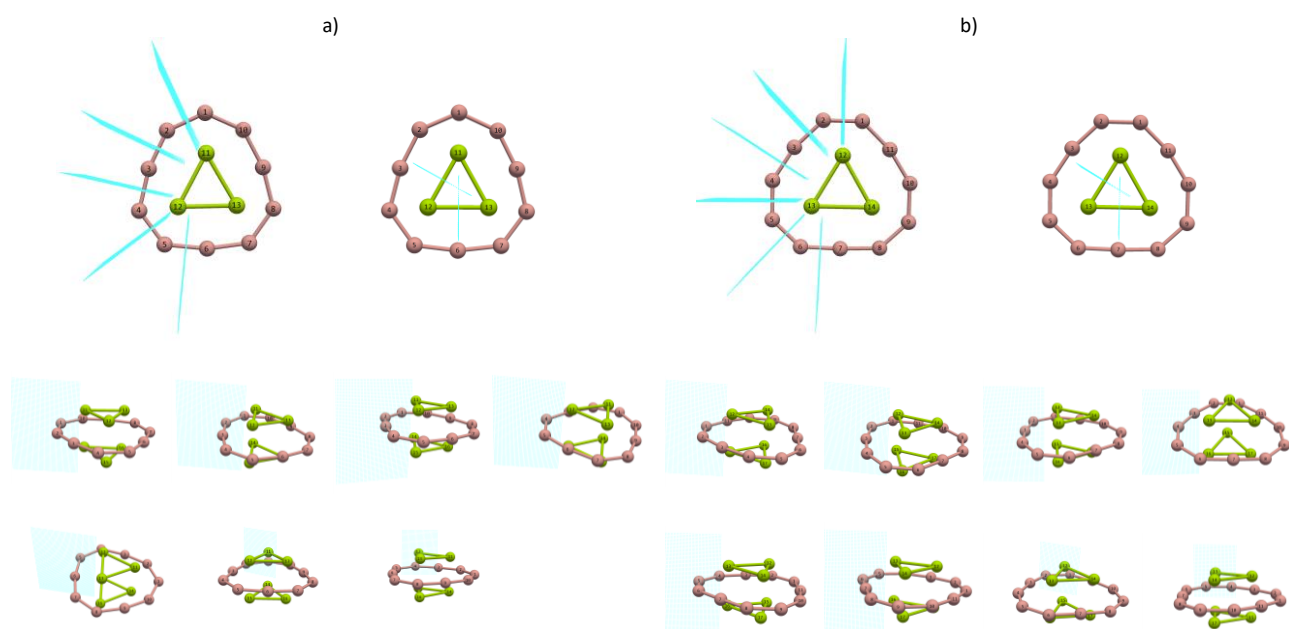

**Fig. S1** Schematic representation of the bond-crossing planes used for the integration of the current density flow through the symmetry-unique bonds in: **1** (a) and **2** (b); top view (top) and side view (bottom).

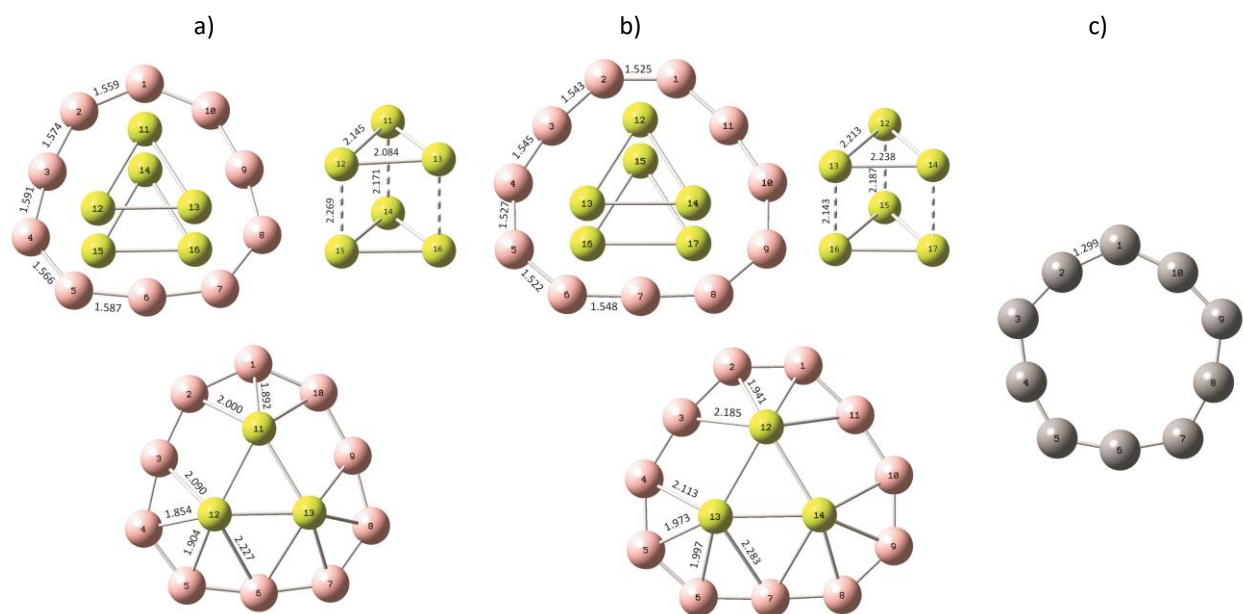

**Fig. S2** Optimized geometries obtained at the BLYP/6-311+G(d) level of theory of: a)  $\text{Be}_6\text{B}_{10}^{2-}$  (**1**); b)  $\text{Be}_6\text{B}_{11}^+$  (**2**) and c)  $\text{C}_{10}$  (**3**). Bond lengths (in Å) are indicated.

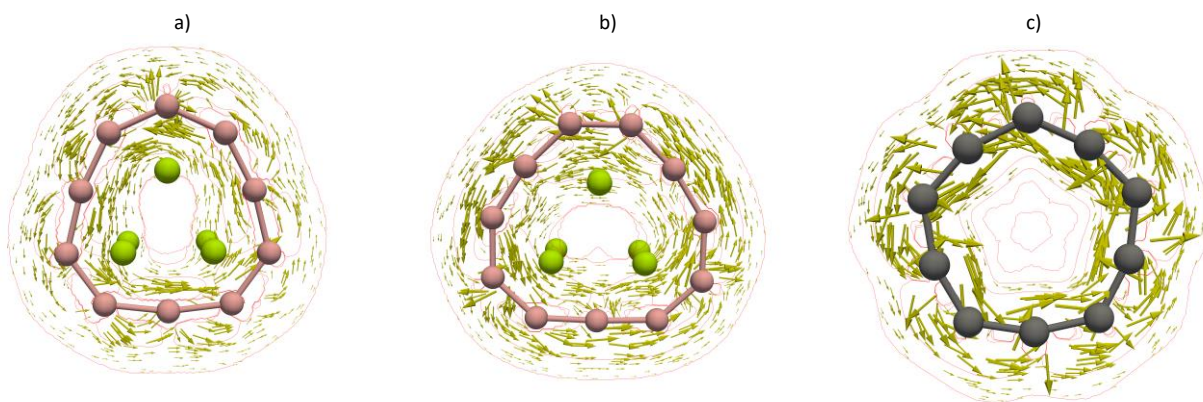

**Fig. S3** Maps of the current density arising from the four  $\sigma$  electrons calculated in the  $\text{B}_{10}/\text{B}_{11}/\text{C}_{10}$  ring plane: a) **1** (HOMO, HOMO-1); b) **2** (HOMO, HOMO-1) and c) **3** (HOMO).

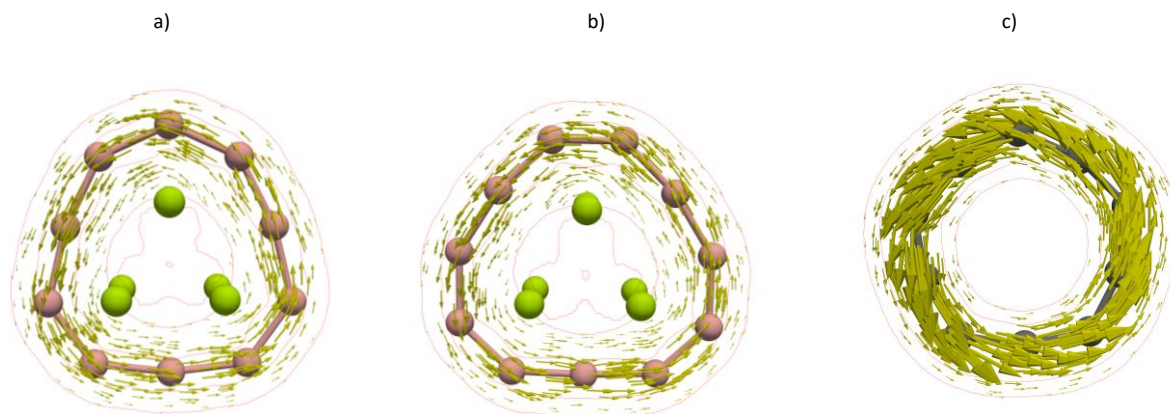

**Fig. S4** Maps of the current density arising from the four  $\pi$  electrons calculated 1 bohr above the B<sub>10</sub>/B<sub>11</sub>/C<sub>10</sub> ring plane in: a) **1** (HOMO-2, HOMO-3); b) **2** (HOMO-2, HOMO-3) and c) **3** (HOMO-1)

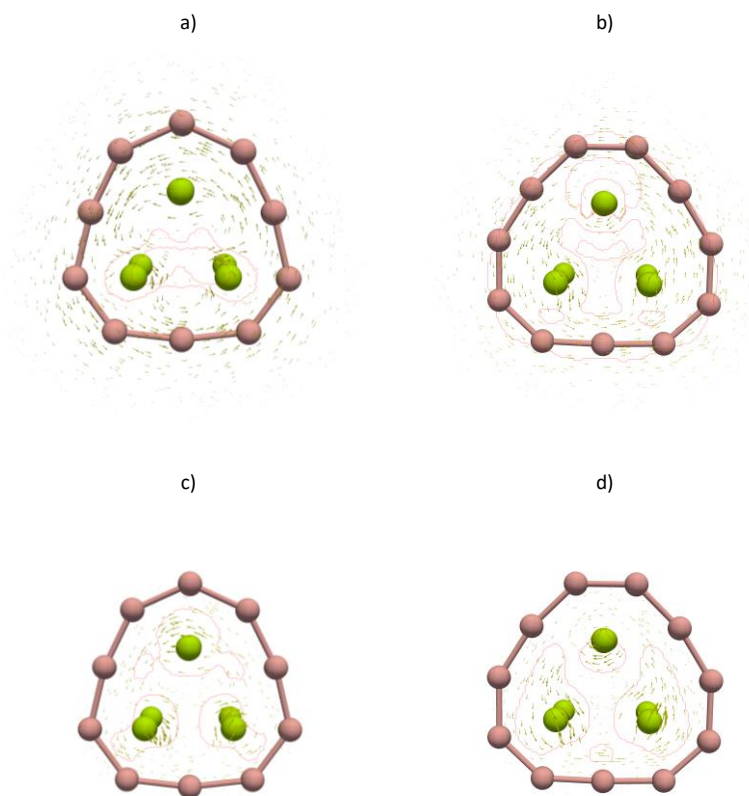

**Fig. S5** Current density maps calculated 1 bohr above the Be<sub>3</sub> ring plane of **1** and **2**: total current density (a and b); the current density obtained by using only the atomic orbitals of Be atoms (c and d).
